# Supplementary material for: Population size estimation of men who have sex with men in Hainan colleges based on geosocial networking App, South China
Source: Research Square preprint supplement (doi:10.21203/rs.3.rs-5940102/v1), 2025-04-17
Supplement: Supplementary file 1 [file 773d823eefc60e948bf7ea0a.docx]

**A** **survey** **on** **the** **use** **of** **Blued** **and** **other** **software**

Hello! We are students majoring in preventive medicine of Hainan Medical University. This survey is conducted for the purpose of understanding of Blued App usage within the MSM population. The questionnaire content is mainly about the use of Blued and other software, including 10 items, which takes about 1 minute. This survey is anonymous, all the data is only used for scientific research, please feel free to fill in according to your own actual situation. Thank you for your cooperation!

*(Note:* *This* *survey* *is* *for MSM* *population* *only)*

1, your age

2, your occupation.

1. Students
2. Teachers
3. Doctor
4. Engineer
5. Accountant
6. Lawyer
7. Courier
8. Hotel management
9. Farmers
10. Fishermen
11. Freelance work
12. Other

3, your native place

4, What do you think your sexual orientation is?

1. Homosexual
2. Bisexual
3. Heterosexual
4. Not sure

5, your ethnicity

6, your education background.

1. Primary School
2. Middle school High School
3. Junior college
4. Bachelor degree or above

7, You feel that you are currently in good health.

1. Relatively good
2. Good
3. Sub-health
4. Other

8, Do you use any of the following dating apps (more than one can choose)?

1. Blued
2. Finka
3. TikTok Private message
4. REDnote private message
5. Other
6. Not using any dating apps

9, The time you have used the following software:

|  | 6 months | 1 year | 2 years and up | No use |
| --- | --- | --- | --- | --- |
| Blued |  |  |  |  |
| Finka |  |  |  |  |
| TiKTok Private message |  |  |  |  |
| REDnote private message |  |  |  |  |

10, The main purposes for which you use Blued software?

1. Normal social communication
2. Find friendship sex partners
3. Commercial sex Partners
4. Unknown use
5. Other
